# Supplementary material for: Evaluation of a low-cost optical particle counter (Alphasense OPC-N2) for ambient air monitoring
Source: Copernicus journal article supplement (doi:10.5194/amt-2017-308), 2017-08-29
Supplement: Supplementary file 1 [file amt-2017-308-supplement.zip]

*Supporting Information for:*

# Evaluation of a low-cost optical particle counter (Alphasense OPC-N2) for ambient air monitoring

---

Leigh R. Crilley<sup>1</sup>, Marvin Shaw<sup>2</sup>, Ryan Pound<sup>2</sup>, Louisa J. Kramer<sup>1</sup>, Robin M. Price<sup>3</sup>, Stuart Young<sup>2</sup>, Alastair C Lewis<sup>2</sup>, Francis D. Pope<sup>1\*</sup>

<sup>1</sup>*School of Geography, Earth and Environmental Sciences, University of Birmingham, Birmingham, United Kingdom, B15 2TT.*

<sup>2</sup>*National Centre for Atmospheric Science, Wolfson Atmospheric Chemistry Laboratories, , University of York, York, United Kingdom, YO10 5DD.*

<sup>3</sup>*Birmingham Open Media (BOM), 1 Dudley Street, Birmingham, B5 4EG.*

\*Corresponding author – [f.pope@bham.ac.uk](mailto:f.pope@bham.ac.uk)

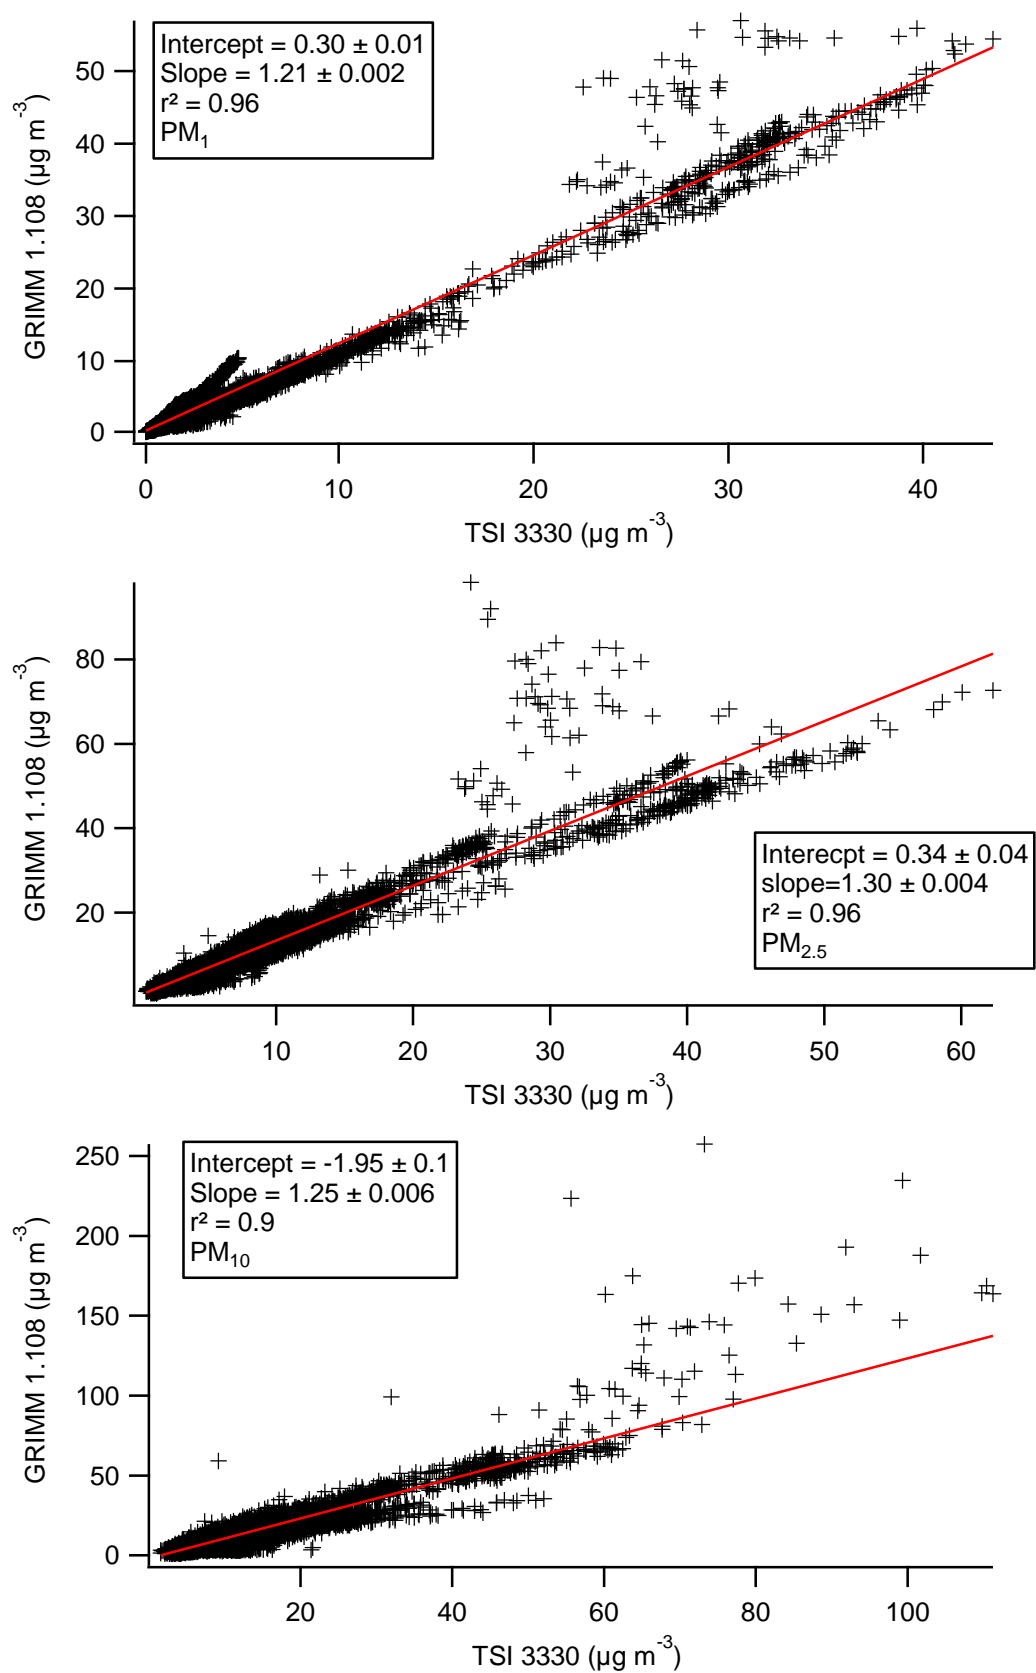

Fig S1: Comparison of the TSI 3330 and GRIMM PAS 1.108 at EROS during the September intensive measurement period for PM<sub>1</sub> (top), PM<sub>2.5</sub> (middle) and PM<sub>10</sub> (bottom) mass concentrations.

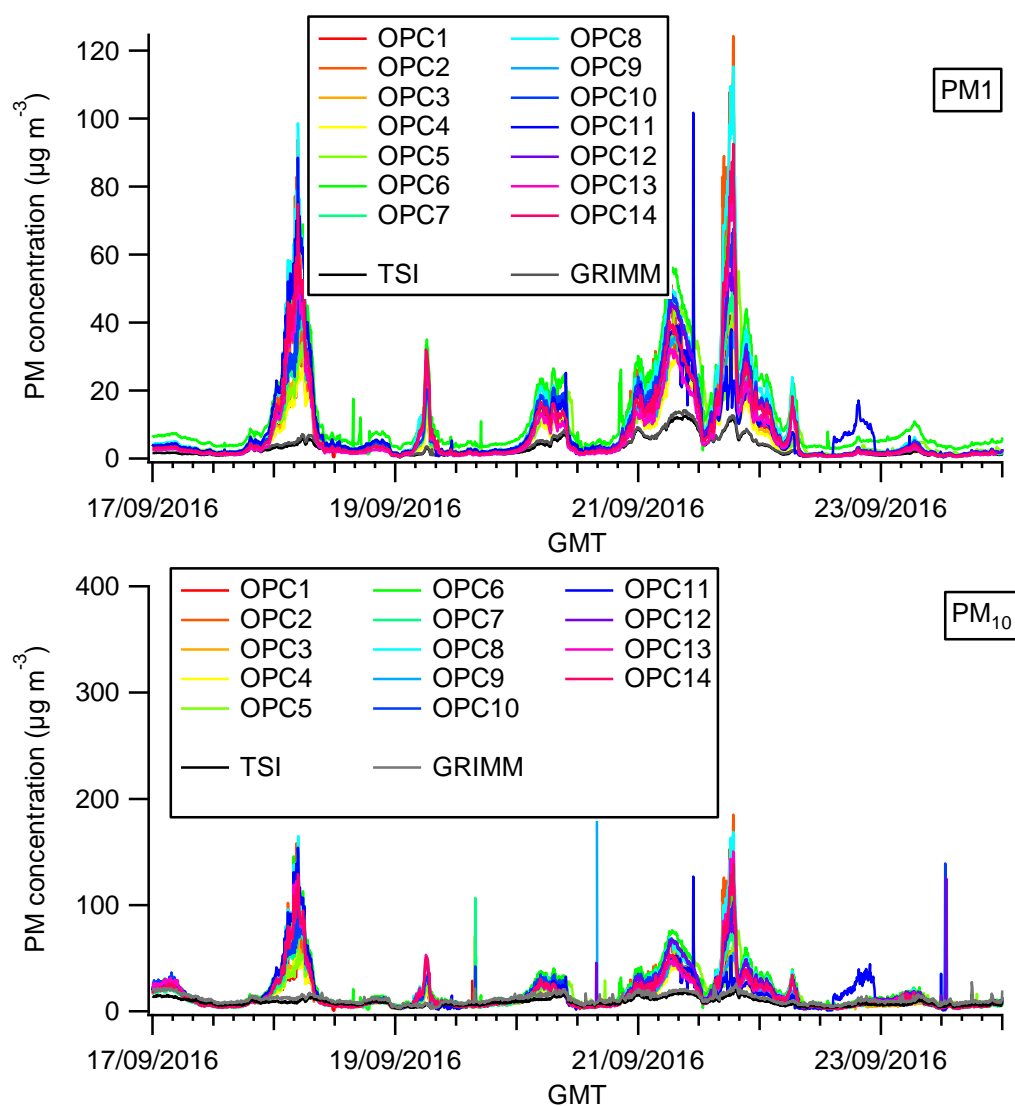

Figure S2: PM<sub>1</sub> and PM<sub>10</sub> concentrations measure by all OPC-N2 and the reference instruments, TSI and GRIMM for selected period with high data coverage.

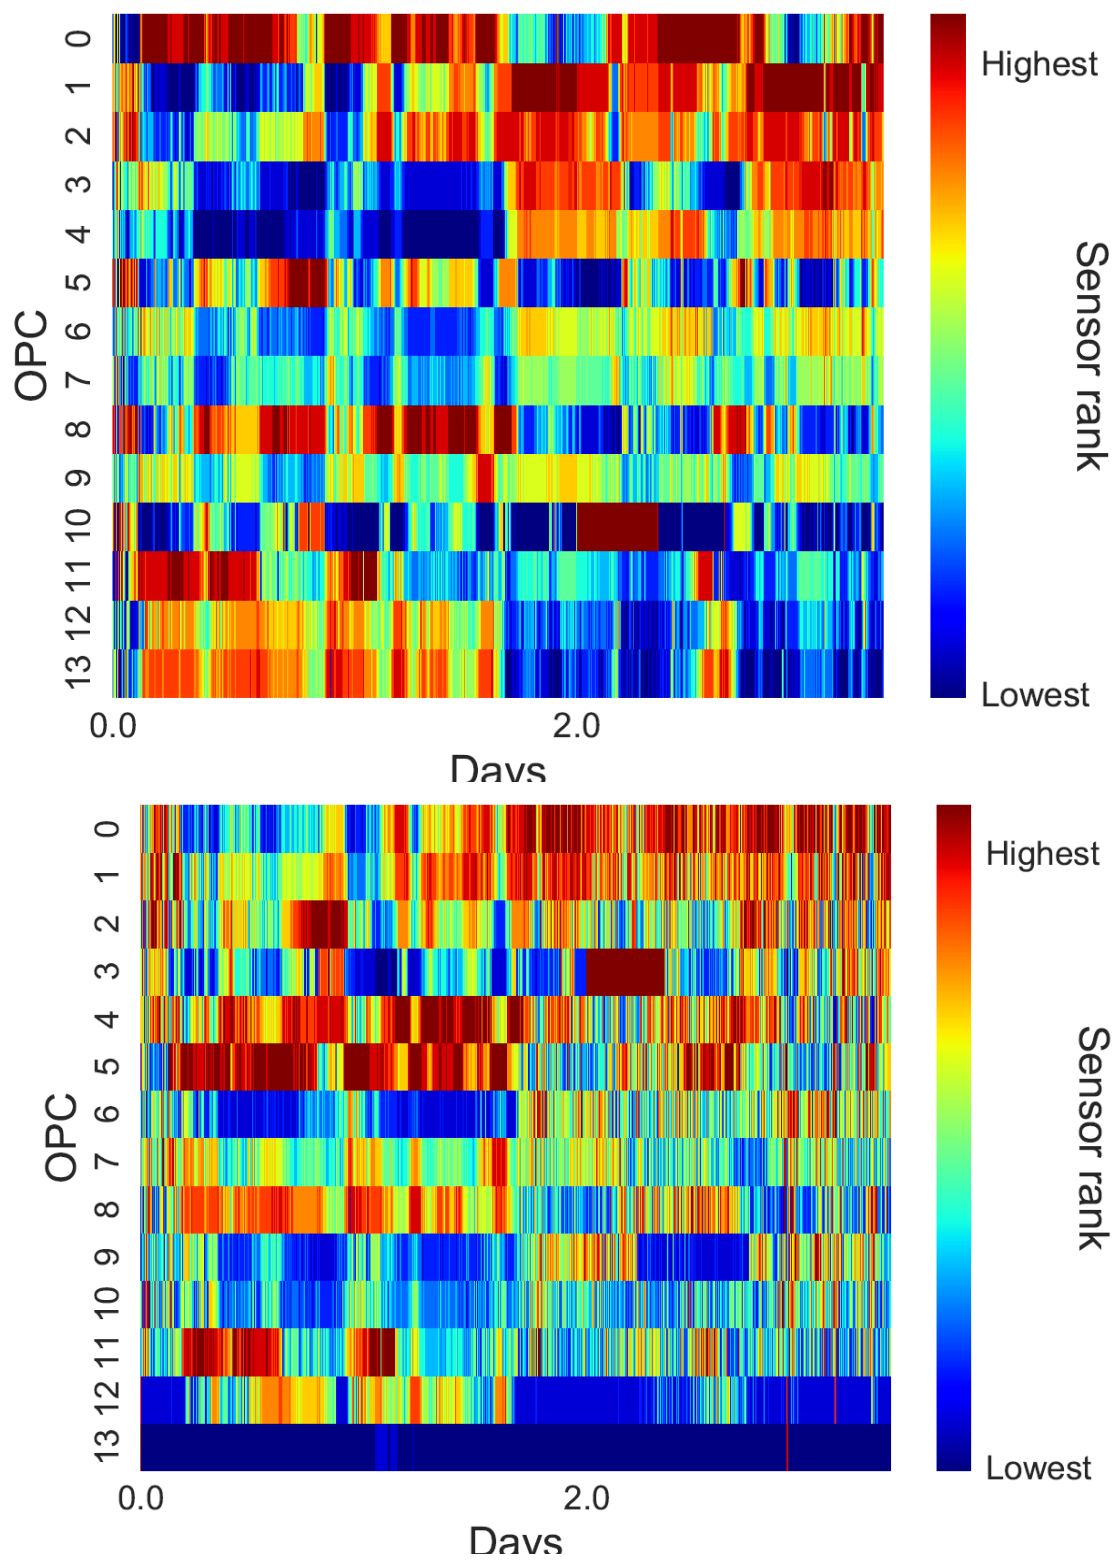

Figure S3: Rank order plot of OPC observations (1 min averaged at 10 $\mu$ m) over a 3 day period (21st – 24th of September), y-axis according to OPC ranking in the final hour of time series.

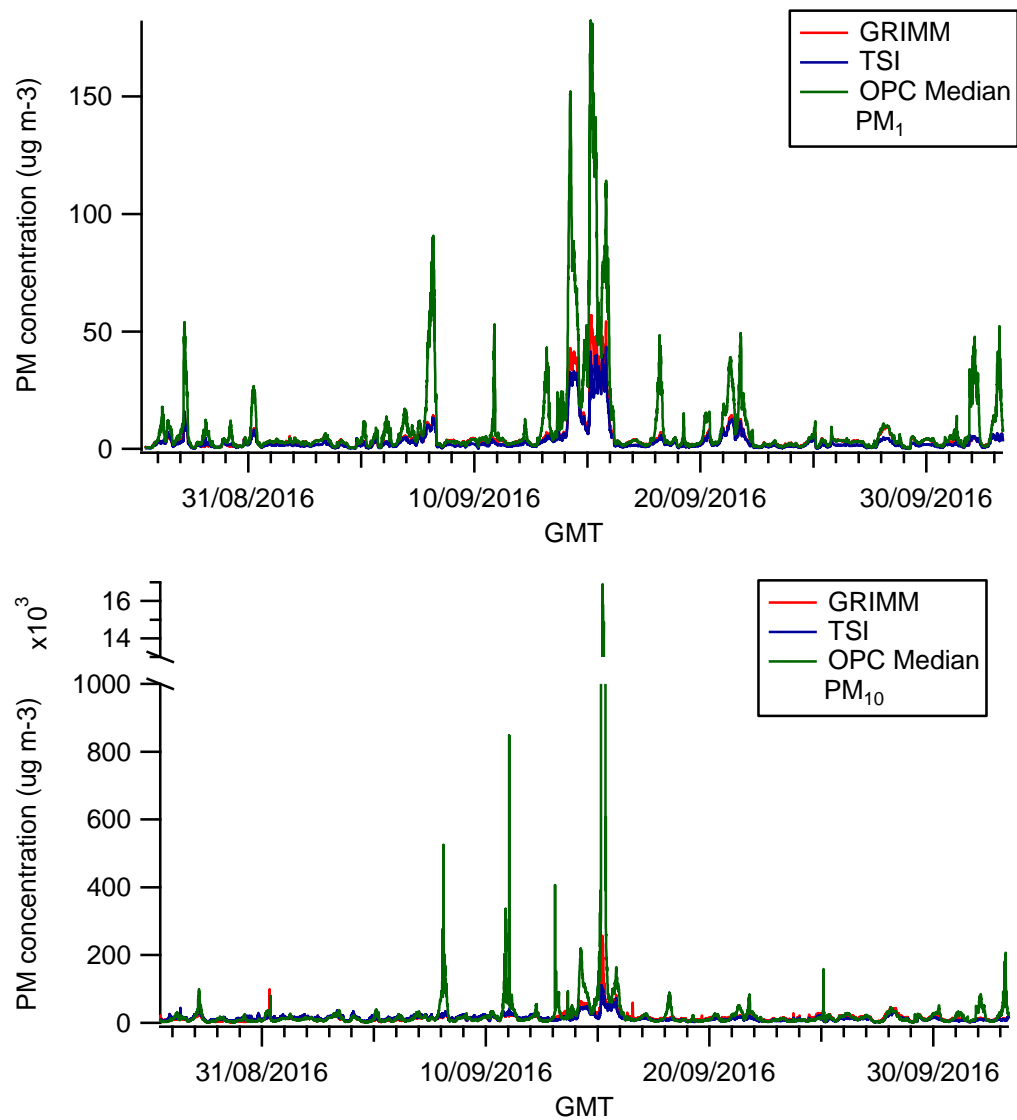

Fig S4: Time series of the measured PM<sub>1</sub> and PM<sub>10</sub> mass concentrations by TSI and GRIMM and the median mass concentration measured by the OPC-N2

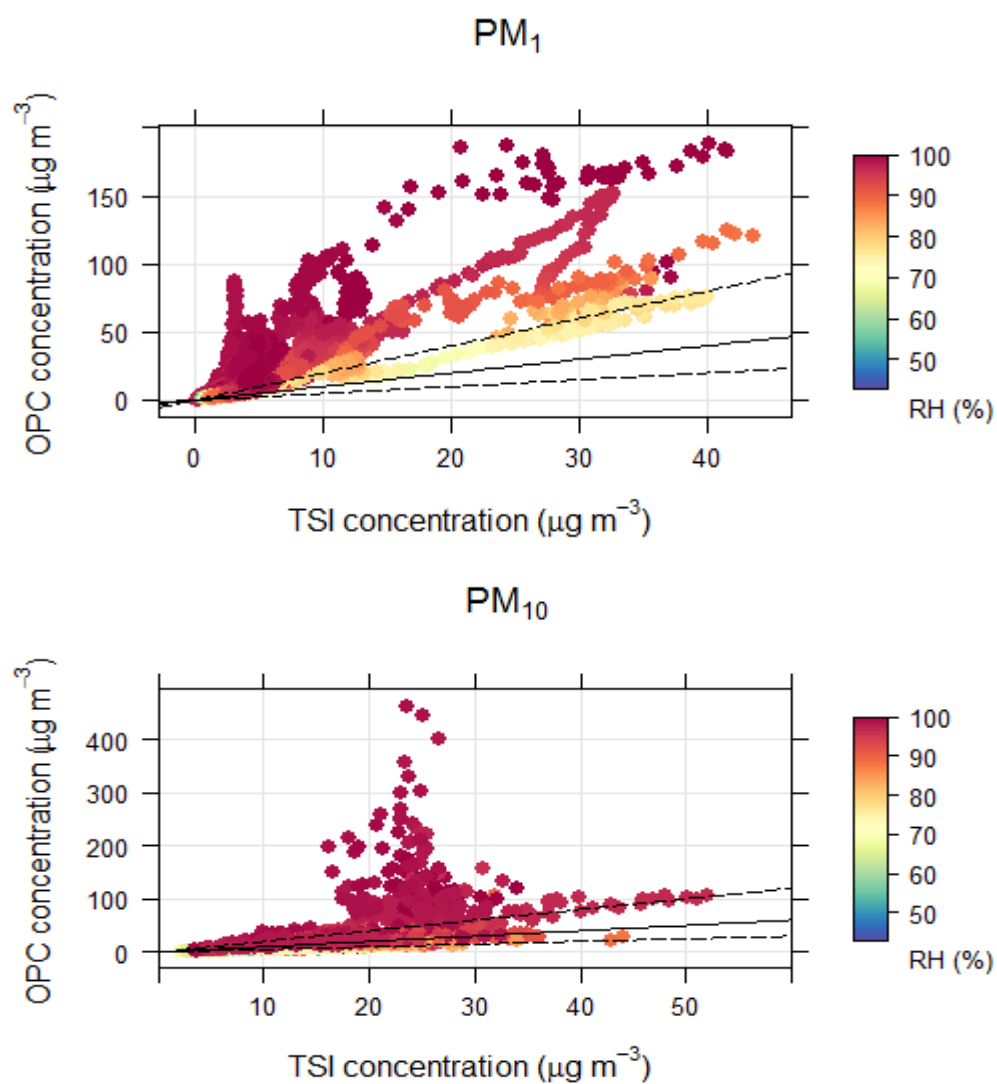

Figure S5: Measured concentrations by the TSI 3330 OPC compared to the median concentration measured by the 14 Alphasense OPCs for  $PM_1$  and  $PM_{10}$  mass concentrations, coloured by the ambient relative humidity. Also shown are the 1:1 (solid) and 0.5:1 and 2:1 (dashed) lines.

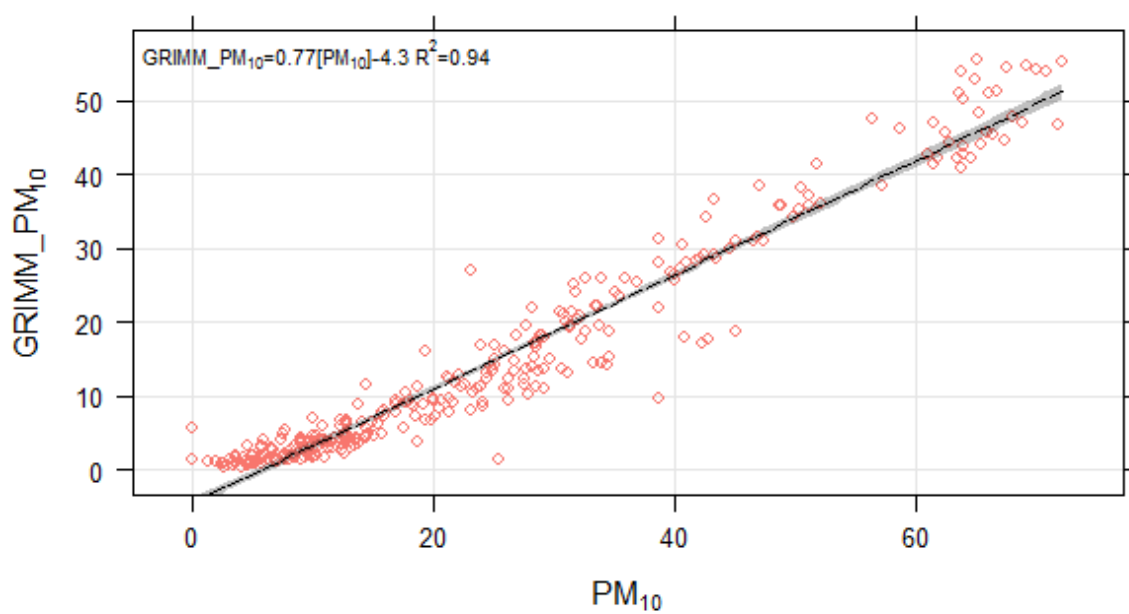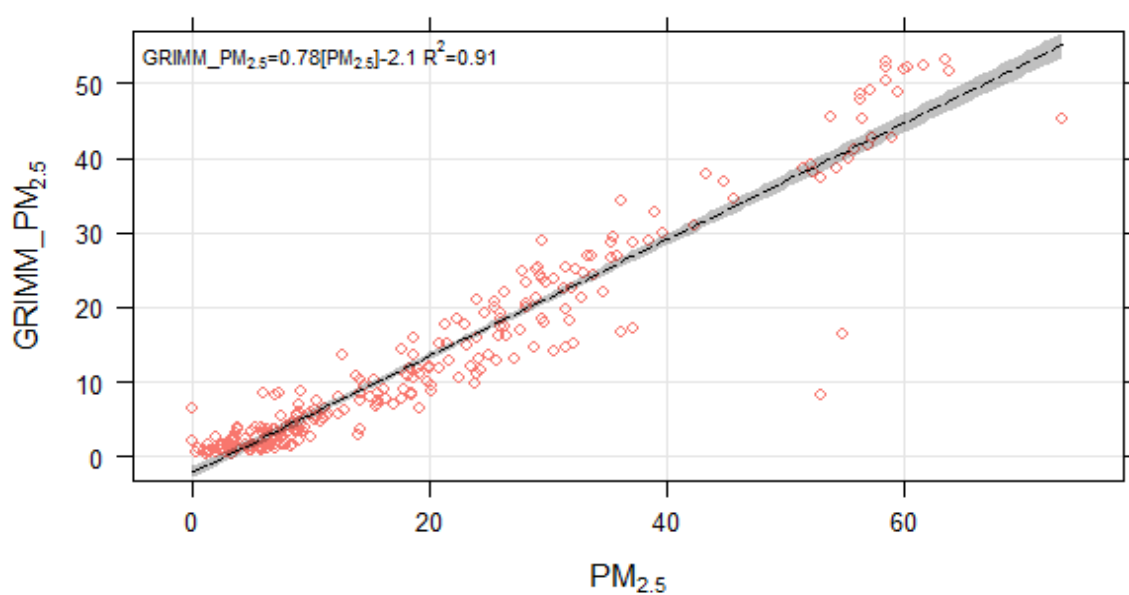

Fig S7: Comparison of the GRIMM and TEOM (y axis) during the measurements at Tyburn Rd

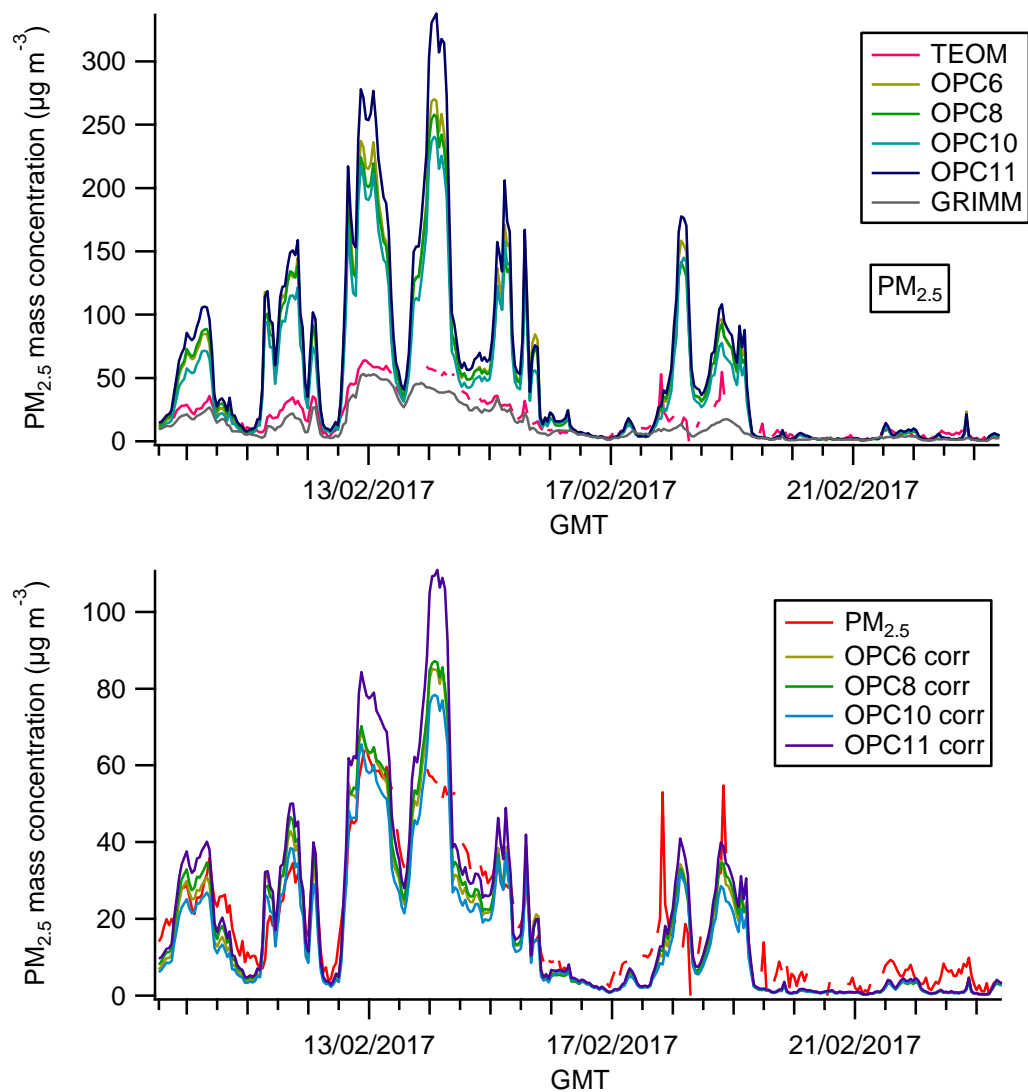

Figure S8: Time series of uncorrected OPC-N2 (top panel) and corrected OPC-N2 PM<sub>2.5</sub> mass concentrations at Tyburn Rd. The TEOM and GRIMM concentrations shown for reference.



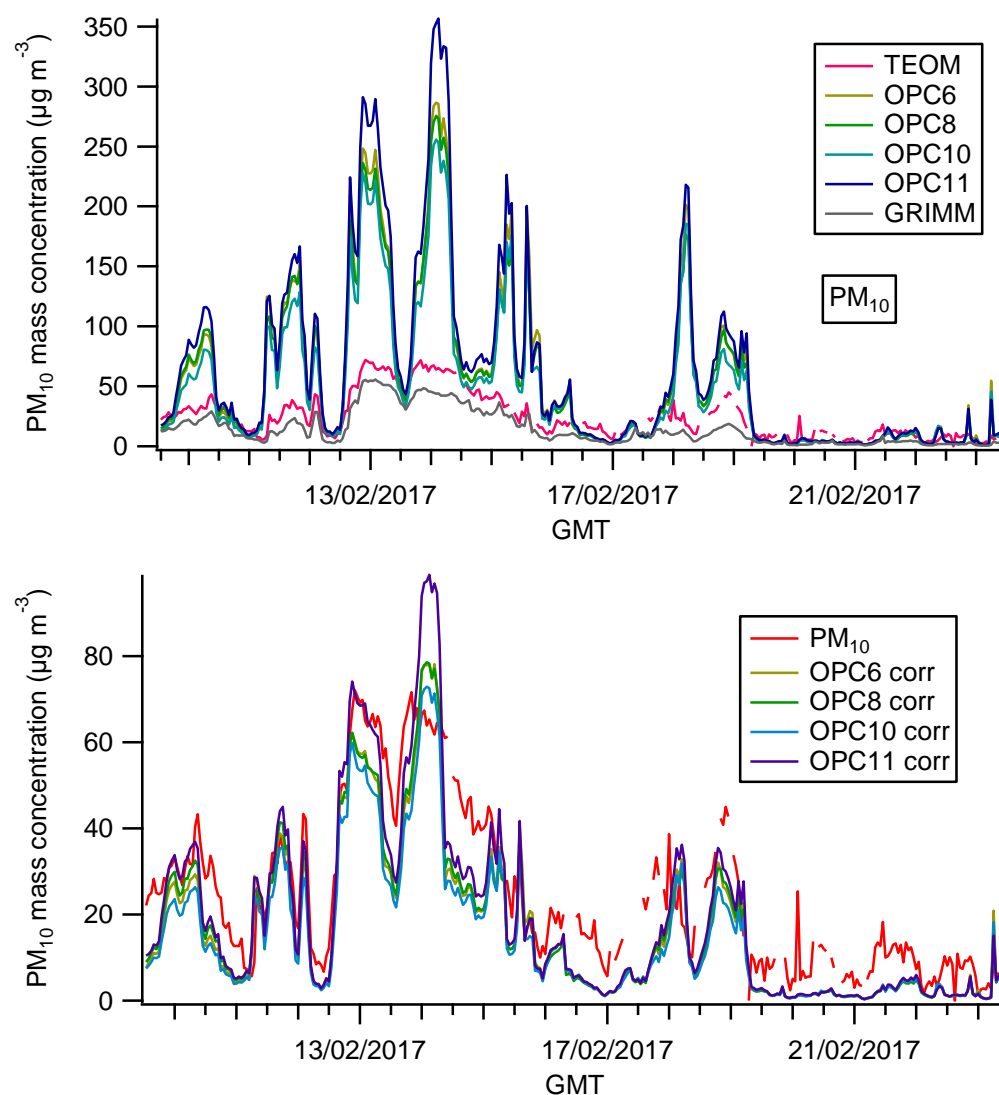

Figure S: Time series of uncorrected OPC-N2 (top panel) and corrected OPC-N2 PM<sub>10</sub> mass concentrations at Tyburn Rd. The TEOM and GRIMM concentrations shown for reference.
